# Supplementary material
Source: PubMed Central journal article supplement (PMC3941022)

Type I neuroblast

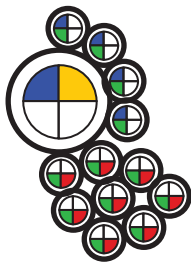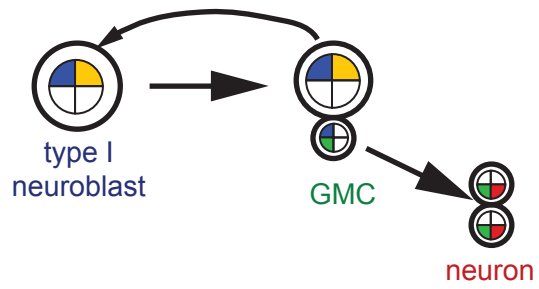

Type II neuroblast

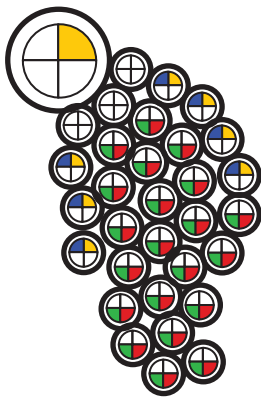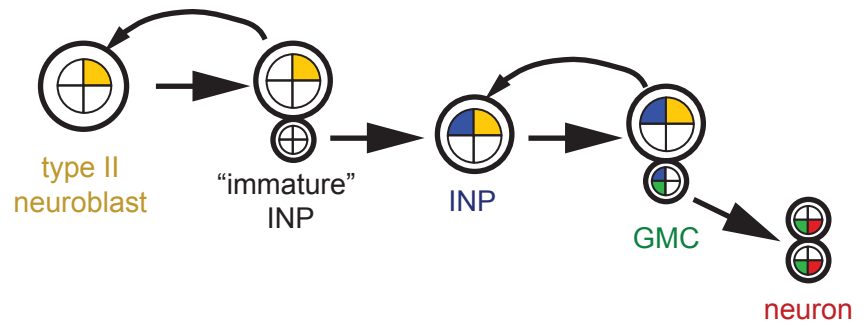

Optic lobe neuroblast

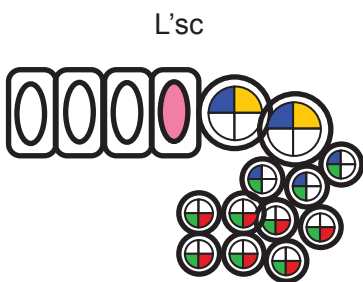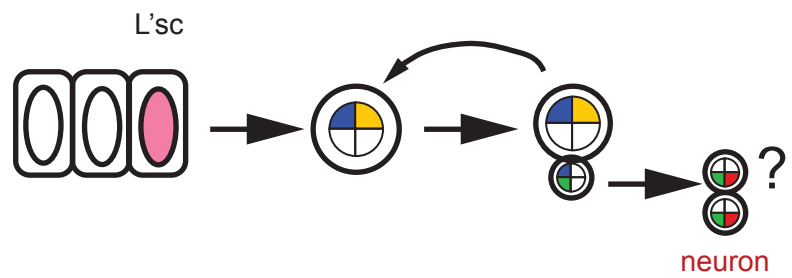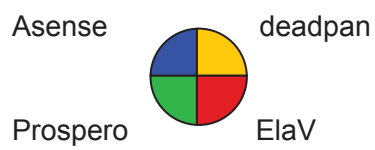

Supplement: NIHMS52311-supplement-suppl__figure_1.pdf [file NIHMS52311-supplement-suppl__figure_1.pdf]
